# Supplementary material for: Suitability of European Trichogramma Species as Biocontrol Agents against the Tomato Leaf Miner Tuta absoluta
Source: MDPI journal article supplement (doi:10.3390/insects11060357), 2020-06-08
Supplement: s1 [file s1]

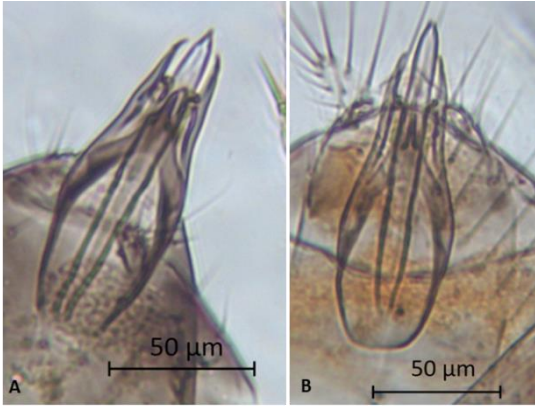

**Figure S1:** Genital capsule of *T. brassicae* (A) and *T. evanescens* (B), assigned to group *evanescens*.

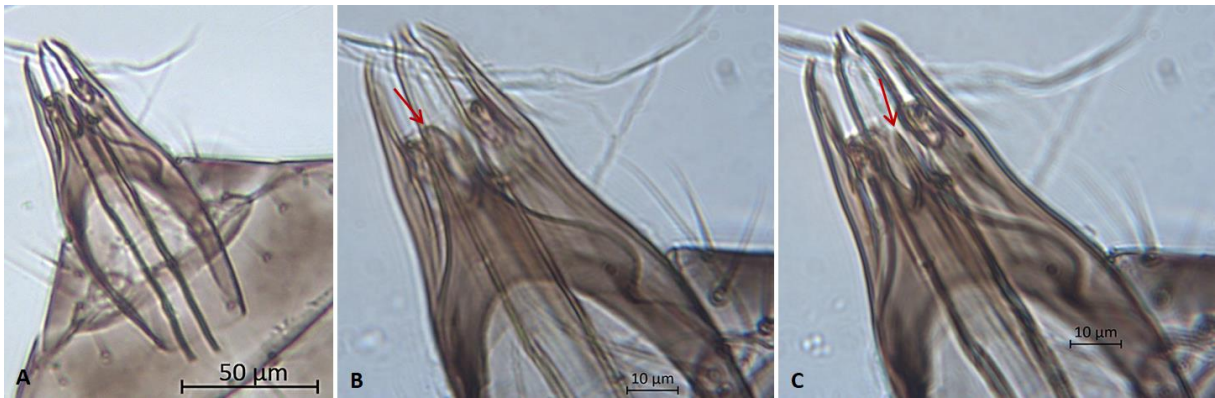

**Figure S2:** Genital capsule of strain COR, assigned to group *minutum*. Posterior extension of dorsal lamina (B) exceeds intervallosellar process (IVP) (C).

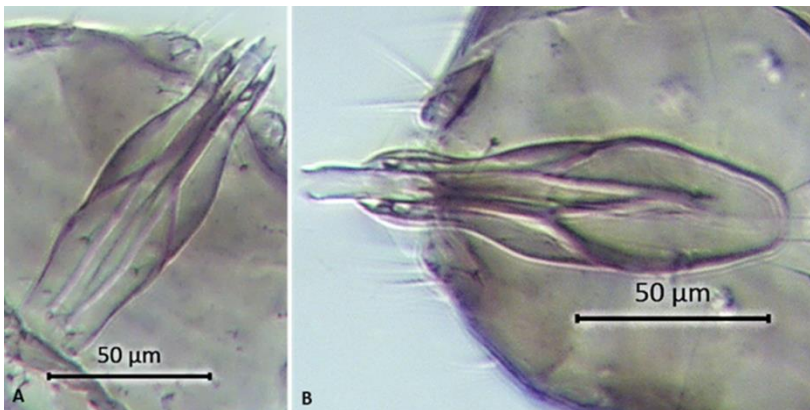

**Figure S3:** Genital capsule of *T. bourarachae* (A) and *T. pintoii* (B), assigned to group *perkinsi*.

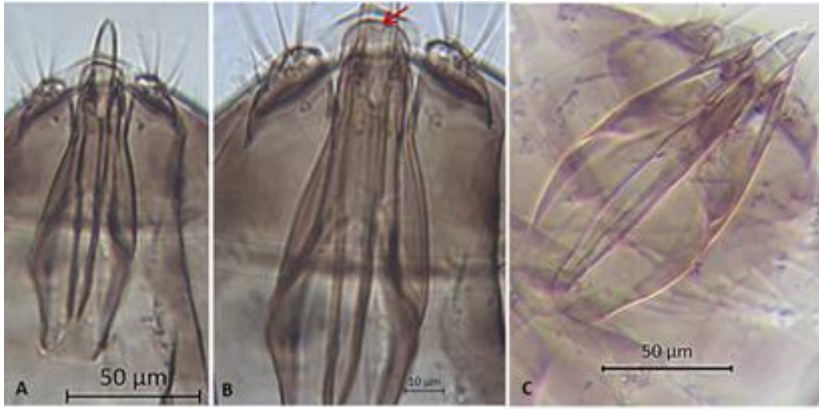

**Figure S4:** Genital capsule of strain PIC (A: Overall view, B: Posterior extension of dorsal lamina is broad and rounded and exceeds IVP, volsella and paramere), assigned to group *fasciatum*, and *T. dendrolimi* (C, group *dendrolimi*).

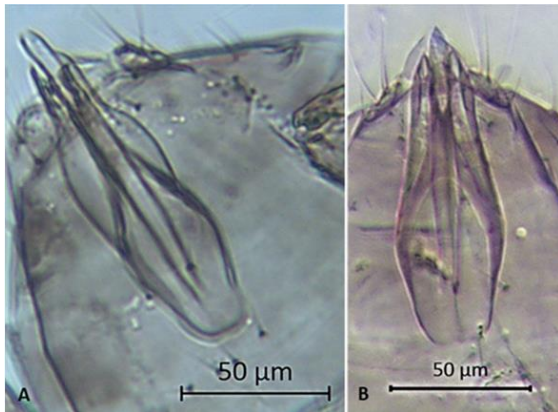

**Figure S5.** Genital capsule of *T. nerudai* (A) and *T. achaeae* (B).
